# Supplementary material
Source: PubMed Central journal article supplement (PMC2630496)

## Supplemental Data

### Structure and metal binding properties of ZnuA, a periplasmic zinc transporter from

### *Escherichia coli*

Liliya A. Yatsunyk,<sup>§</sup> J. Allen Easton,<sup>||</sup> Lydia R. Kim,<sup>§</sup> Stacy A. Sugarbaker,<sup>||</sup> Brian Bennett,<sup>⊥</sup>  
Robert M. Breece,<sup>¶</sup> Ivan I. Vorontsov,<sup>#</sup> David L. Tierney,<sup>¶</sup> Michael W. Crowder,<sup>||,✉</sup> and Amy C.  
Rosenzweig<sup>§,✉</sup>

<sup>§</sup>Departments of Biochemistry, Molecular Biology, and Cell Biology and of Chemistry,  
Northwestern University, Evanston, IL 60208, <sup>||</sup>Department of Chemistry and Biochemistry,  
Miami University, Oxford, OH 45056, <sup>⊥</sup>National Biomedical EPR Center, Department of  
Biophysics, Medical College of Wisconsin, Milwaukee, WI 53226, <sup>¶</sup>Department of Chemistry  
and Chemical Biology, University of New Mexico, Albuquerque, NM 87131, <sup>#</sup>Department of  
Molecular Pharmacology and Biological Chemistry, Northwestern University Feinberg School of  
Medicine, Chicago, IL 60611

✉To whom correspondence may be addressed. Tel.: 847-467-5301; Fax: 847-467-6489; E-mail:  
[amyr@northwestern.edu](mailto:amyr@northwestern.edu) or Tel.: 513-529-7274; Fax: 513-529-5715; E-mail:  
[crowdemw@muohio.edu](mailto:crowdemw@muohio.edu)

**Table S1.** Important interatomic distances and angles. Only distances less than 3.60 Å are included in the table.

| Ligand atoms                             | ZnZnuA<br><i>form I</i>  | ZnZnuA<br><i>form II</i> | CoZnuA        | apoZnuA                         |
|------------------------------------------|--------------------------|--------------------------|---------------|---------------------------------|
| Metal-to-ligand distances                |                          |                          |               |                                 |
| O <sup>e1</sup> (E59)                    | 2.02 (1.96) <sup>1</sup> | 1.95 (2.04)              | 1.98 (2.15)   | - (-)                           |
| N <sup>e2</sup> (H60)                    | 2.03 (1.98)              | 1.97 (2.02)              | 2.00 (2.00)   | - (-)                           |
| N <sup>e2</sup> (H143)                   | 2.08 (2.05)              | 2.02 (2.07)              | 2.21 (2.19)   | - (-)                           |
| N <sup>e2</sup> (H207)                   | 2.03 (2.12)              | 2.04 (1.97)              | 1.94 (1.93)   | - (-)                           |
| H <sub>2</sub> O                         |                          |                          | 3.11 (3.21)   | - (-)                           |
| E59                                      |                          |                          |               |                                 |
| O <sup>e1</sup> – M                      | 2.02 (1.96)              | 1.95 (2.04)              | 1.98 (2.15)   | - (-)                           |
| O <sup>e1</sup> – N <sup>e2</sup> (H143) | 3.41 (3.28)              | 3.21 (3.36)              | 3.43 (3.56)   | 3.44 (3.22, 3.56)               |
| O <sup>e1</sup> – N <sup>e2</sup> (H207) | 3.27 (3.28)              | 3.24 (3.15)              | 3.24 (3.45)   | 3.53 (-)                        |
| O <sup>e1</sup> – H <sub>2</sub> O       | 3.41 (3.39)              | - (3.47)                 | - (-)         | - (-)                           |
| O <sup>e2</sup> – H <sub>2</sub> O       | 2.80 (2.69)              | 2.77 (2.76)              | 2.84 (2.55)   | - (-)                           |
| His60                                    |                          |                          |               |                                 |
| N <sup>e2</sup> – M                      | 2.03 (1.98)              | 1.97 (2.02)              | 2.00 (2.00)   | - (-)                           |
| N <sup>e2</sup> – N <sup>e2</sup> (H143) | 3.27 (3.38)              | 3.33 (3.32)              | 3.44 (3.41)   | - (-)                           |
| N <sup>e2</sup> – N <sup>e2</sup> (H207) | 3.28 (3.24)              | 3.26 (3.42)              | 3.43 (3.39)   | - (-)                           |
| N <sup>e2</sup> – H <sub>2</sub> O       | - (-)                    | - (3.29)                 | 3.08 (3.19)   | - (3.26)                        |
| N <sup>δ1</sup> – H <sub>2</sub> O(1)    | - (2.84)                 | 3.08 (2.75)              | 2.70 (2.65)   | - (3.26)                        |
| N <sup>δ1</sup> – H <sub>2</sub> O(2)    | - (-)                    | - (-)                    | - (3.58)      | - (-)                           |
| N <sup>e2</sup> – CO(M85)                | - (-)                    | - (-)                    | - (-)         | 3.34 (3.28) <sup>2</sup>        |
| His143                                   |                          |                          |               |                                 |
| N <sup>e2</sup> – M                      | 2.08 (2.05)              | 2.02 (2.07)              | 2.21 (2.19)   | - (-)                           |
| N <sup>e2</sup> – O <sup>e1</sup> (E59)  | 3.41 (3.28)              | 3.21 (3.36)              | 3.43 (3.56)   | 3.44 (3.22, 3.56)               |
| N <sup>e2</sup> – N <sup>e2</sup> (H60)  | 3.27 (3.38)              | 3.33 (3.32)              | 3.44 (3.41)   | - (-)                           |
| N <sup>e2</sup> – N <sup>e2</sup> (H207) | 3.42 (3.46)              | 3.36 (3.33)              | 3.39 (3.23)   | - (-)                           |
| N <sup>δ1</sup> – O(N141)                | 2.90 (2.97)              | 2.90 (2.90)              | 2.99 (3.19)   | 2.84 (3.02)                     |
| N <sup>δ1</sup> – CO(D208)               | 3.37 (3.37)              | 3.44 (3.32)              | 3.27 (3.26)   | - (-)                           |
| N <sup>δ1</sup> – H <sub>2</sub> O       | 3.25 (3.40)              | 3.30 (3.29)              | 3.39 (3.30)   | - (-)                           |
| His207                                   |                          |                          |               |                                 |
| N <sup>e2</sup> – M                      | 2.03 (2.12)              | 2.04 (1.97)              | 1.94 (1.93)   | - (-)                           |
| N <sup>e2</sup> – O <sup>e1</sup> (E59)  | 3.27 (3.28)              | 3.24 (3.15)              | 3.24 (3.45)   | 3.53 (-)                        |
| N <sup>e2</sup> – N <sup>e2</sup> (H60)  | 3.28 (3.24)              | 3.26 (3.42)              | 3.43 (3.39)   | - (-)                           |
| N <sup>e2</sup> – N <sup>e2</sup> (H143) | 3.42 (3.46)              | 3.36 (3.33)              | 3.39 (3.23)   | - (3.61) <sup>3</sup>           |
| N <sup>δ1</sup> – O <sup>e1</sup> (E256) | 3.35 (3.30)              | 3.10 (3.62)              | - (3.18)      | 3.10 (2.90, 3.16 <sup>3</sup> ) |
| N <sup>δ1</sup> – O <sup>e2</sup> (E256) | 2.70 (2.73)              | 2.79 (2.73)              | 2.62 (2.78)   | 2.49 (-)                        |
| Tetrahedral Angles                       |                          |                          |               |                                 |
| E59-Zn-H60                               | 112.0 (110.0)            | 106.0 (105.3)            | 94.3 (100.3)  |                                 |
| E59-Zn-H143                              | 112.4 (109.5)            | 108.0 (109.9)            | 110.1 (109.0) |                                 |
| E59-Zn-H207                              | 107.3 (106.9)            | 108.9 (103.6)            | 111.3 (115.7) |                                 |
| H60-Zn-H143                              | 105.2 (113.9)            | 112.8 (108.6)            | 109.8 (109.0) |                                 |
| H60-Zn-H207                              | 107.5 (104.4)            | 109.0 (117.8)            | 120.8 (119.4) |                                 |
| H143-Zn-H207                             | 112.5 (111.8)            | 111.9 (111.2)            | 109.5 (103.2) |                                 |

<sup>1</sup>Data for molecule B are shown in parentheses

<sup>2</sup>Only if flipped by 180°

**Table S2.** Comparison of metal – ligand distances in various ZnZnuA structures.

| Ligand atoms <sup>1</sup> | ZnZnuA<br><i>form I</i>  | ZnZnuA<br><i>form II</i> | CoZnuA      | ZnZnuA<br>Chandra | ZnZnuA<br>Li | <i>Syn-</i><br>ZnZnuA |
|---------------------------|--------------------------|--------------------------|-------------|-------------------|--------------|-----------------------|
| O <sup>ε1</sup> (E59)     | 2.02 (1.96) <sup>2</sup> | 1.95 (2.04)              | 1.98 (2.15) | -                 | 1.86         | -                     |
| N <sup>ε2</sup> (H60)     | 2.03 (1.98)              | 1.97 (2.02)              | 2.00 (2.00) | 1.90 (2.00)       | 2.03         | 2.00                  |
| N <sup>ε2</sup> (H143)    | 2.08 (2.05)              | 2.02 (2.07)              | 2.21 (2.19) | 2.07 (2.07)       | 2.05         | 2.10                  |
| N <sup>ε2</sup> (H207)    | 2.03 (2.12)              | 2.04 (1.97)              | 1.94 (1.93) | 2.00 (2.06)       | 2.08         | 2.10                  |
| H <sub>2</sub> O          | -                        | -                        | 3.11 (3.21) | 2.27 (2.29)       | -            | 2.30                  |

<sup>1</sup>Based on *Eco-ZnuA* numbering

<sup>2</sup>Data for molecule B are shown in parentheses

**Figure S1.** Circular dichroism spectra of apoZnuA, 5  $\mu\text{M}$  (bold solid line) in 20 mM potassium phosphate, pH 7.5, 20 mM NaF) with excess of (A)  $\text{Cd}^{2+}$  125  $\mu\text{M}$  (dashed line), (B)  $\text{Mn}^{2+}$  25  $\mu\text{M}$  (dashed line), (C)  $\text{Co}^{2+}$  25  $\mu\text{M}$  (dashed line).

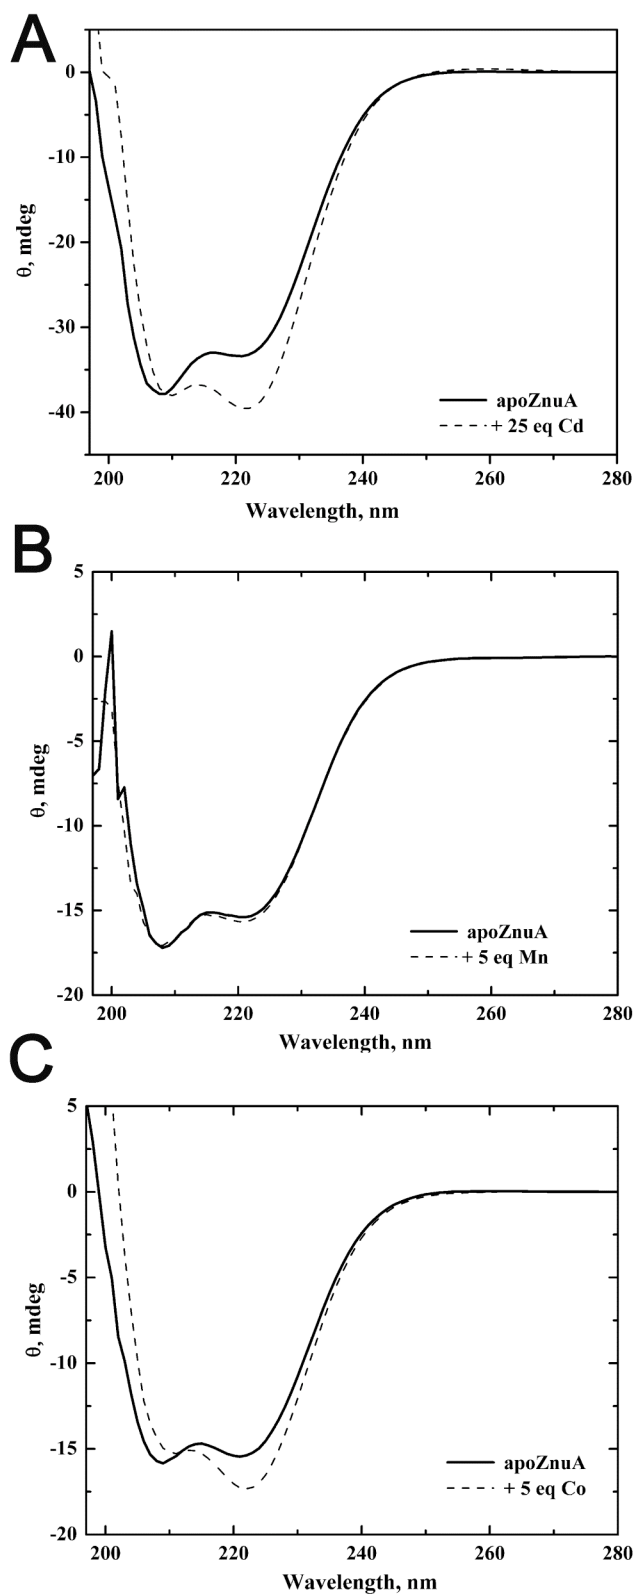

**Figure S2. Zinc exchange between ZnZnuA and apo MF.** ApoZnuA was fully loaded with  $Zn^{2+}$ , excess metal was removed by 5 successive rounds of concentration/dilution and fully metallated ZnZnuA was incubated with increasing concentration of MF for 1 h. Protein and MF were separated on a Superdex 75 gel filtration column. Zinc and protein concentration were measured to calculate the extent of metal transfer between *Eco*-ZnuA and MF.

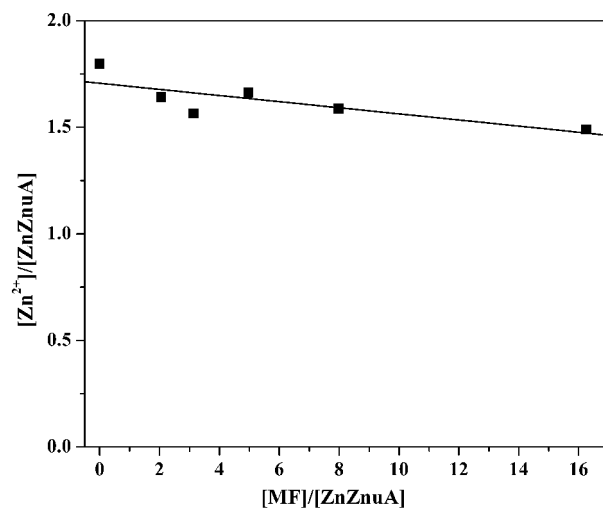

**Figure S3. UV-Vis difference spectrum of 2-CoZnuA minus 1-CoZnuA.** The spectral feature at 506 nm with  $\epsilon \approx 8 \text{ M}^{-1}\text{cm}^{-1}$  is assigned to the second  $\text{Co}^{2+}$  binding site in *Eco-ZnuA* that is predicted to be six-coordinate.

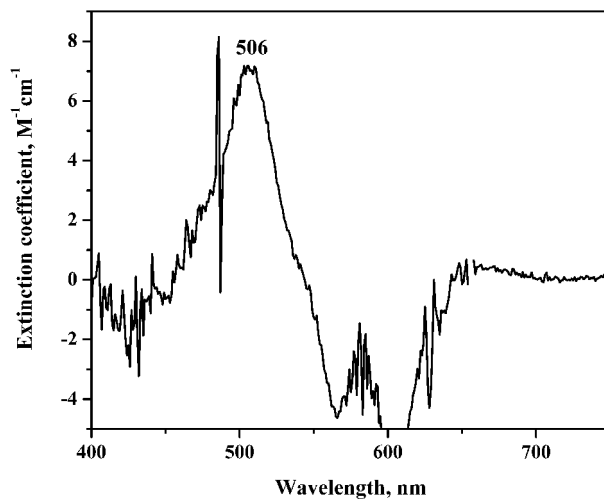

**Figure S4.** Fits to unfiltered Zn EXAFS data for 1-Zn and ZnCo Zn<sub>0.5</sub>A and corresponding Fourier transforms. Solid lines represent experimental data, while open diamonds represent the best fits, summarized in Table 3.

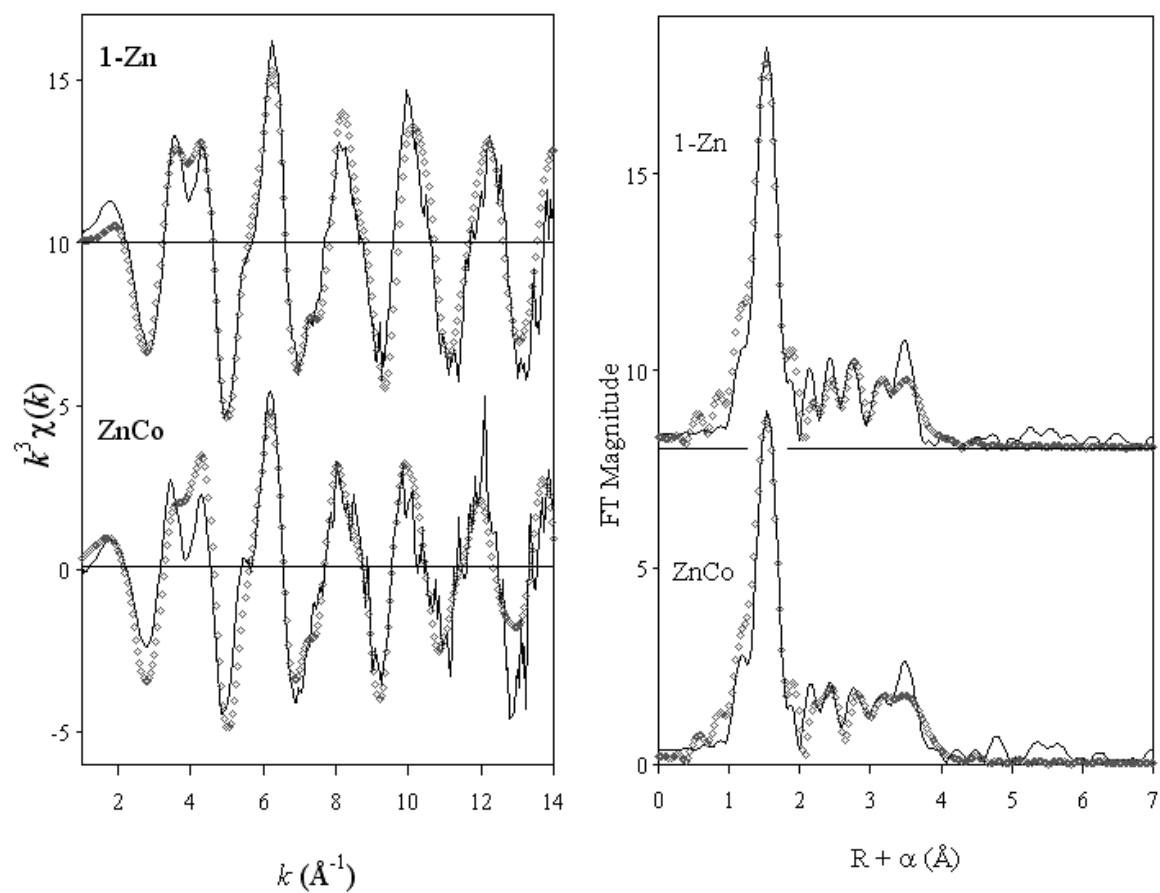

**Figure S5.** Fits to unfiltered Co EXAFS data for ZnCoZnuA and corresponding Fourier transforms. Solid lines represent raw data, while open diamonds represent the best fits; the order of presentation corresponds to that in Table 3.

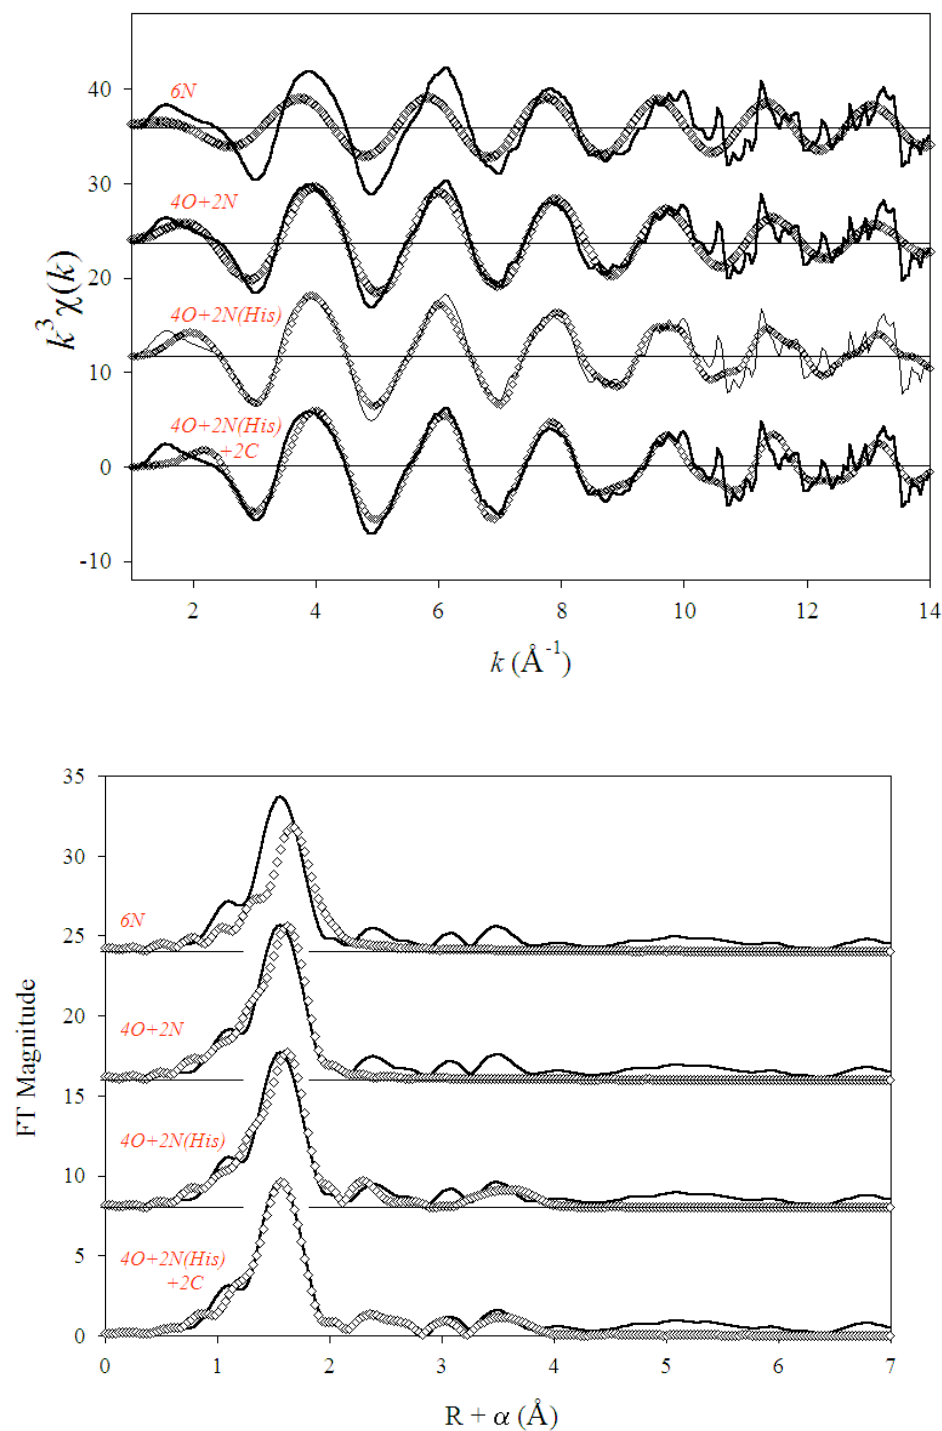



**Figure S6.** Changes in ANS fluorescence intensity at 510 nm of 0.5 mM ANS solution upon addition of various metal ions. All the spectra have been corrected for ANS fluorescence by subtracting the fluorescence of an ANS solution of equivalent volume and concentration. Experimental conditions:  $\lambda_{\text{ex}} = 380 \text{ nm}$ ,  $\lambda_{\text{em}} = 510 \text{ nm}$ ,  $T = 23 \text{ }^\circ\text{C}$ , buffer, 50 mM HEPES, pH 7.5, 200 mM NaCl.

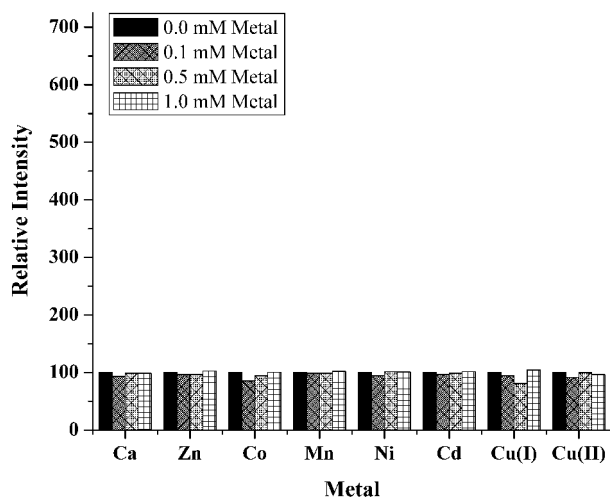

**Figure S7.** Comparison of *Eco*-ZnuA to other related MBRs. *Eco*-ZnuA (molecule A, red), *Syn*-ZnuA (green), *Spn*-PsaA (blue) and *Tpa*-TroA (grey). Metals are colored accordingly. The His-rich loop and the C-terminus are labeled. The arrow points to the position of helix  $\alpha_6$  and the asterisk marks the position of the  $\beta_6\alpha_6$  loop. All the structures have the position of  $\alpha_6$  and  $\beta_6\alpha_6$  similar to that in *Eco*-ZnuA containing two  $Zn^{2+}$  ions.

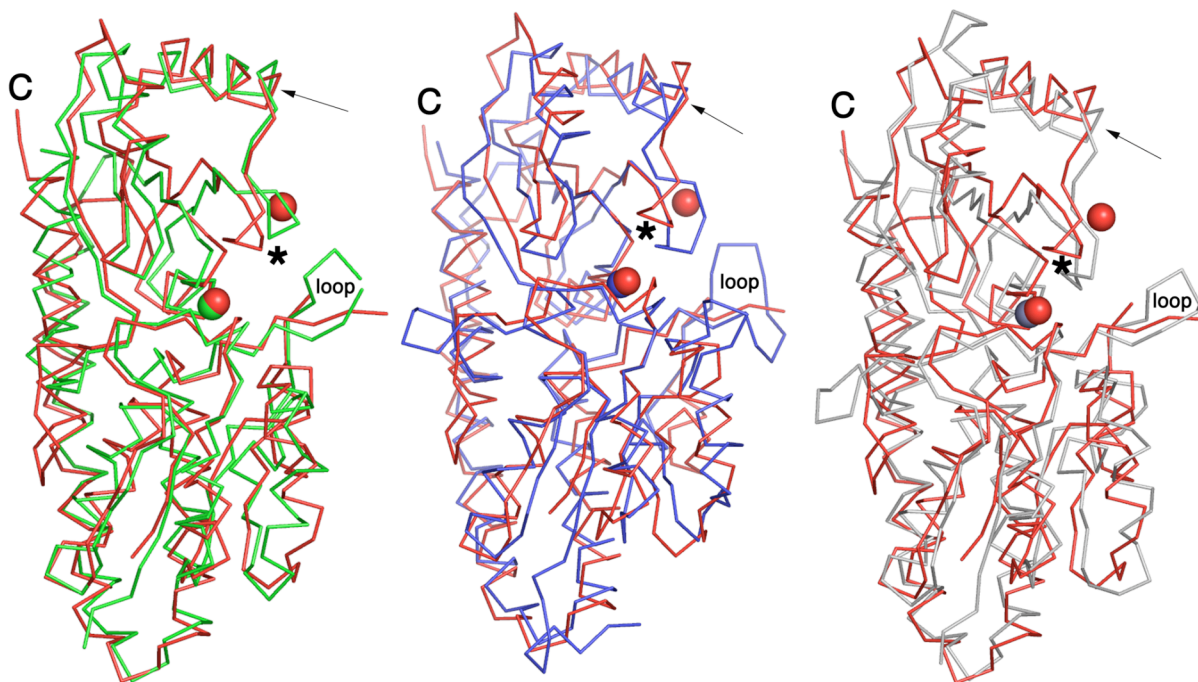

Supplement: NIHMS85932-supplement-supplemental.pdf [file NIHMS85932-supplement-supplemental.pdf]
